# Supplementary material for: Humic acid as promising organic anodes for lithium/sodium ion batteries
Source: Royal Society of Chemistry journal article supplement (doi:10.1039/c5cc04772b), 2015-01-01
Supplement: c5cc04772b1.pdf [file c5cc04772b1.pdf]

Electronic supplementary information (ESI) for

## **Humic acid as promising organic anodes for lithium/sodium ion batteries**

*Hui Zhu,<sup>a,†</sup> Jiao Yin,<sup>b,†</sup> Xue Zhao,<sup>a</sup> Chuanyi Wang,<sup>b</sup> and Xiurong Yang<sup>a,\*</sup>*

---

a. State Key Laboratory of Electroanalytical Chemistry, Changchun Institute of Applied Chemistry, Chinese Academy of Sciences, 5625 Renmin Street, Changchun 130022, China.

b. Key Laboratory of Functional Materials and Devices for Special Environments, Xinjiang Technical Institute of Physics & Chemistry, Chinese Academy of Sciences, 40-1 South Beijing Road, Urumqi, Xinjiang 830011, China.

† These authors contributed equally to this work.

\* Corresponding author: Tel.: 86-431-85262056. Fax: 86-431-85689278. E-mail: xryang@ciac.ac.cn (Prof. Xiurong Yang)

Contents:

1. Experimental Section.
2. Fig. S-1 SEM image of HA.
3. Fig. S-2 TEM image of HA.
4. Fig. S-3 FTIR spectrum of the charged HA samples.

## **1. Experimental Details:**

**Materials and Characterization:** Humic acid was purchased from Alfa Aesar Company and used without further treatment. Scanning electron microscopy (SEM) images were taken using Philips XL 30 and a JEOL JSM-6700F microscope. Transmission electron microscopy (TEM) images were taken on a FEI Tecnai G2 F20 transmission electron microscope with an acceleration voltage of 200 kV. Fourier transform infrared spectroscopy (FTIR) measurement for HA was performed on a Bruker Tensor 27 Spectrometer using KBr pellets. The X-ray photoelectron spectrum (XPS) sweep was recorded on the ESCALAB 250 (Thermo Electron) in which the excitation of X-ray was provided by a monochromatic source of Al K $\alpha$  (1486.6 eV). Survey scans were obtained using a pass energy of 100 eV while high resolution scans of specific elements were obtained using a 20 eV pass energy.

**Electrochemistry Investigation:** For the working electrode preparation, HA was homogeneously mixed with Super P carbon and the binder-PTFE at a mass ratio of 85:10:5 (the total mass: 9mg). Then the obtained slurry was casted on a piece of Cu foil and dried in vacuum at 70°C for 24 h. The coin cells CR2032 were assembled in an argon-filled glove box, in which HA, metallic lithium or metallic sodium foils, glassy fiber were used as working electrodes, counteracting electrodes and separators, respectively. The electrolytes for LIBs were 1 M LiPF<sub>6</sub> in EC+EMC+DMC (1:1:1 volume ratio). The electrolytes for SIBs were 1 M NaPF<sub>6</sub>+PC+DMC (1:1 volume ratio). The CV curves were recorded using an electrochemical analyzer (Autolab Potentiostat, PGSTAT302N) and the discharge and charge measurements were carried out on a Land BT2000 battery test system (Wuhan, China).

2.

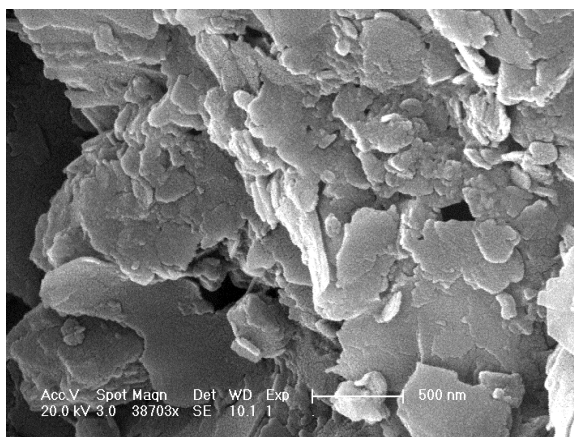

**Fig. S-1** SEM image of HA.

3.

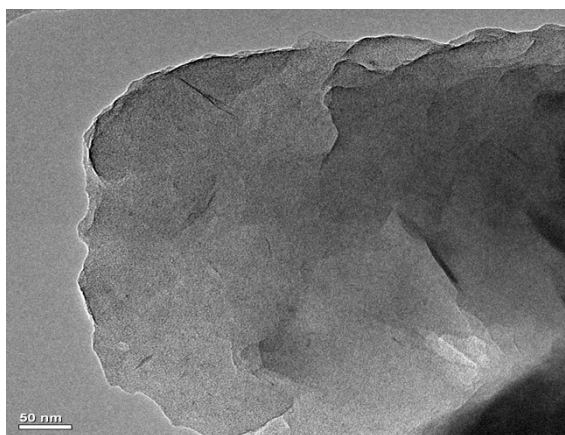

**Fig. S-2** TEM image of HA.

4.

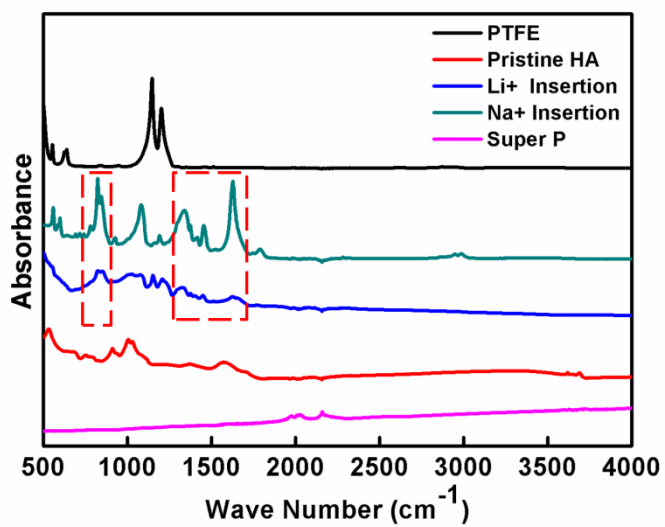

**Fig. S-3** FTIR spectrum of the charged HA samples.
